# Supplementary material for: Risk of Heart Failure in Patients with ST-Elevation Myocardial Infarction Receiving Drug-Eluting Stent Implantation and Undefined Duration of Antiplatelets
Source: MDPI journal article supplement (doi:10.3390/jpm12030369), 2022-02-28
Supplement: s1 [file s1]

## Supplementary Materials

**Table S1. Disease diagnostic coding and ATC code for medication**

| Disease/Comorbidity          | ICD-9-CM/ATC                                                                                                                                                                                        |
|------------------------------|-----------------------------------------------------------------------------------------------------------------------------------------------------------------------------------------------------|
| MI                           | 410                                                                                                                                                                                                 |
| STEMI                        | 410.0, 410.1, 410.2, 410.3, 410.4, 410.5, 410.6, 410.8                                                                                                                                              |
| NSTEMI                       | 410.7, 410.9                                                                                                                                                                                        |
| HF                           | 428                                                                                                                                                                                                 |
| DM                           | 250                                                                                                                                                                                                 |
| HTN                          | 401–402                                                                                                                                                                                             |
| Dyslipidemia                 | 272                                                                                                                                                                                                 |
| CVD                          | 430–438                                                                                                                                                                                             |
| AF                           | 427.31                                                                                                                                                                                              |
| Cancer                       | 140–239                                                                                                                                                                                             |
| COPD                         | 491, 492, 494, 496                                                                                                                                                                                  |
| Asthma                       | 493                                                                                                                                                                                                 |
| Dementia                     | 290–294                                                                                                                                                                                             |
| Parkinsonism                 | 332                                                                                                                                                                                                 |
| OA                           | 715                                                                                                                                                                                                 |
| RA                           | 714                                                                                                                                                                                                 |
| Rheumatism                   | 729                                                                                                                                                                                                 |
| Bleeding                     | 535.01, 535.11, 535.21, 535.31, 535.41, 535.51, 535.61, 537.83, 562.02, 562.03, 562.12, 562.13, 569.3, 569.85, 578.0, 578.1, 578.9, 430, 431, 432, 432.0, 432.1, 432.9, 767.0, 852–852.5, 853–853.1 |
| CRD                          | 582, 583–583.7, 585, 586, 587, 588                                                                                                                                                                  |
| <b>Medications</b>           |                                                                                                                                                                                                     |
| ACEI/ARB                     | C09AA, C09BA, C09BB, C09CA, C09DA, C09DB, C09DX                                                                                                                                                     |
| ARNI                         | C09DX04                                                                                                                                                                                             |
| Beta-blocker                 | C07AA, C07AB, C07AG                                                                                                                                                                                 |
| Ivabradine                   | C01EB17                                                                                                                                                                                             |
| Nitrate                      | C01DA, C01DX                                                                                                                                                                                        |
| Aspirin                      | B01AC06                                                                                                                                                                                             |
| P2Y <sub>12</sub> inhibitors | B01AC04 (Clopidogrel), B01AC22 (Prasugrel), B01AC24 (Ticagrelor)                                                                                                                                    |
| Statin                       | C10AA                                                                                                                                                                                               |
| PPI                          | A02BC                                                                                                                                                                                               |
| Steroid                      | H02, R03BA                                                                                                                                                                                          |
| NSAID                        | M01A, M02A, N02BA                                                                                                                                                                                   |
| OAC                          | Warfarin (B01AA03), Rivaroxaban (B01AF01), Apixaban (B01AF02), Dabigatran (B01AE07), Edoxaban (B01AF03)                                                                                             |

Abbreviations: ACEI = angiotensin-converting enzyme inhibitor; AF = atrial fibrillation; ARB = angiotensin II receptor blocker; ARNI = angiotensin receptor/neprilysin inhibitor; ATC = anatomical therapeutic chemical; COPD = chronic obstructive pulmonary disease; CRD = chronic renal disease; CVD = cerebrovascular disease; DM = diabetes mellitus; HTN = hypertension; ICD-9-CM = International Classification of Diseases, Ninth Revision, Clinical Modification; MI = myocardial infarction; NSAID = nonsteroidal anti-inflammatory drug; NSTEMI = non-ST-elevation myocardial infarction; OA = osteoarthritis; OAC = oral anticoagulant; PPI = proton pump inhibitor; RA = rheumatoid arthritis; STEMI = ST-elevation myocardial infarction.

**Table S2. The rates of CICR and the risk of stent-associated HHF between different NG-DESs categorized by coated drugs.**

| NG-DESs / Follow-ups | 1-year | 2-year | 3-year | 4-year | 5-year | Adjusted SHR (95% CI) | <i>p</i> |
|----------------------|--------|--------|--------|--------|--------|-----------------------|----------|
| <b>SES</b>           | 5.09%  | 6.98%  | 8.20%  | 9.42%  | 11.3%  | Reference             | -        |
| <b>EES</b>           | 3.41%  | 4.70%  | 5.53%  | 6.36%  | 7.66%  | 0.66 (0.43 – 1.02)    | 0.06     |
| <b>BES</b>           | 3.65%  | 5.02%  | 5.91%  | 6.80%  | 8.18%  | 0.71 (0.46 – 1.11)    | 0.13     |
| <b>ZES</b>           | 3.93%  | 5.41%  | 6.36%  | 7.31%  | 8.80%  | 0.77 (0.51 – 1.16)    | 0.21     |

Abbreviation: BES = biolimus-eluting stent; CI = confidence interval; CICR = cumulative incidence competing risk; EES = everolimus-eluting stent; HHF = hospitalization for heart failure; NG-DES = new-generation drug-eluting stent; SES = sirolimus-eluting stent; SHR = subdistribution hazard ratio; ZES = zotarolimus-eluting stent.

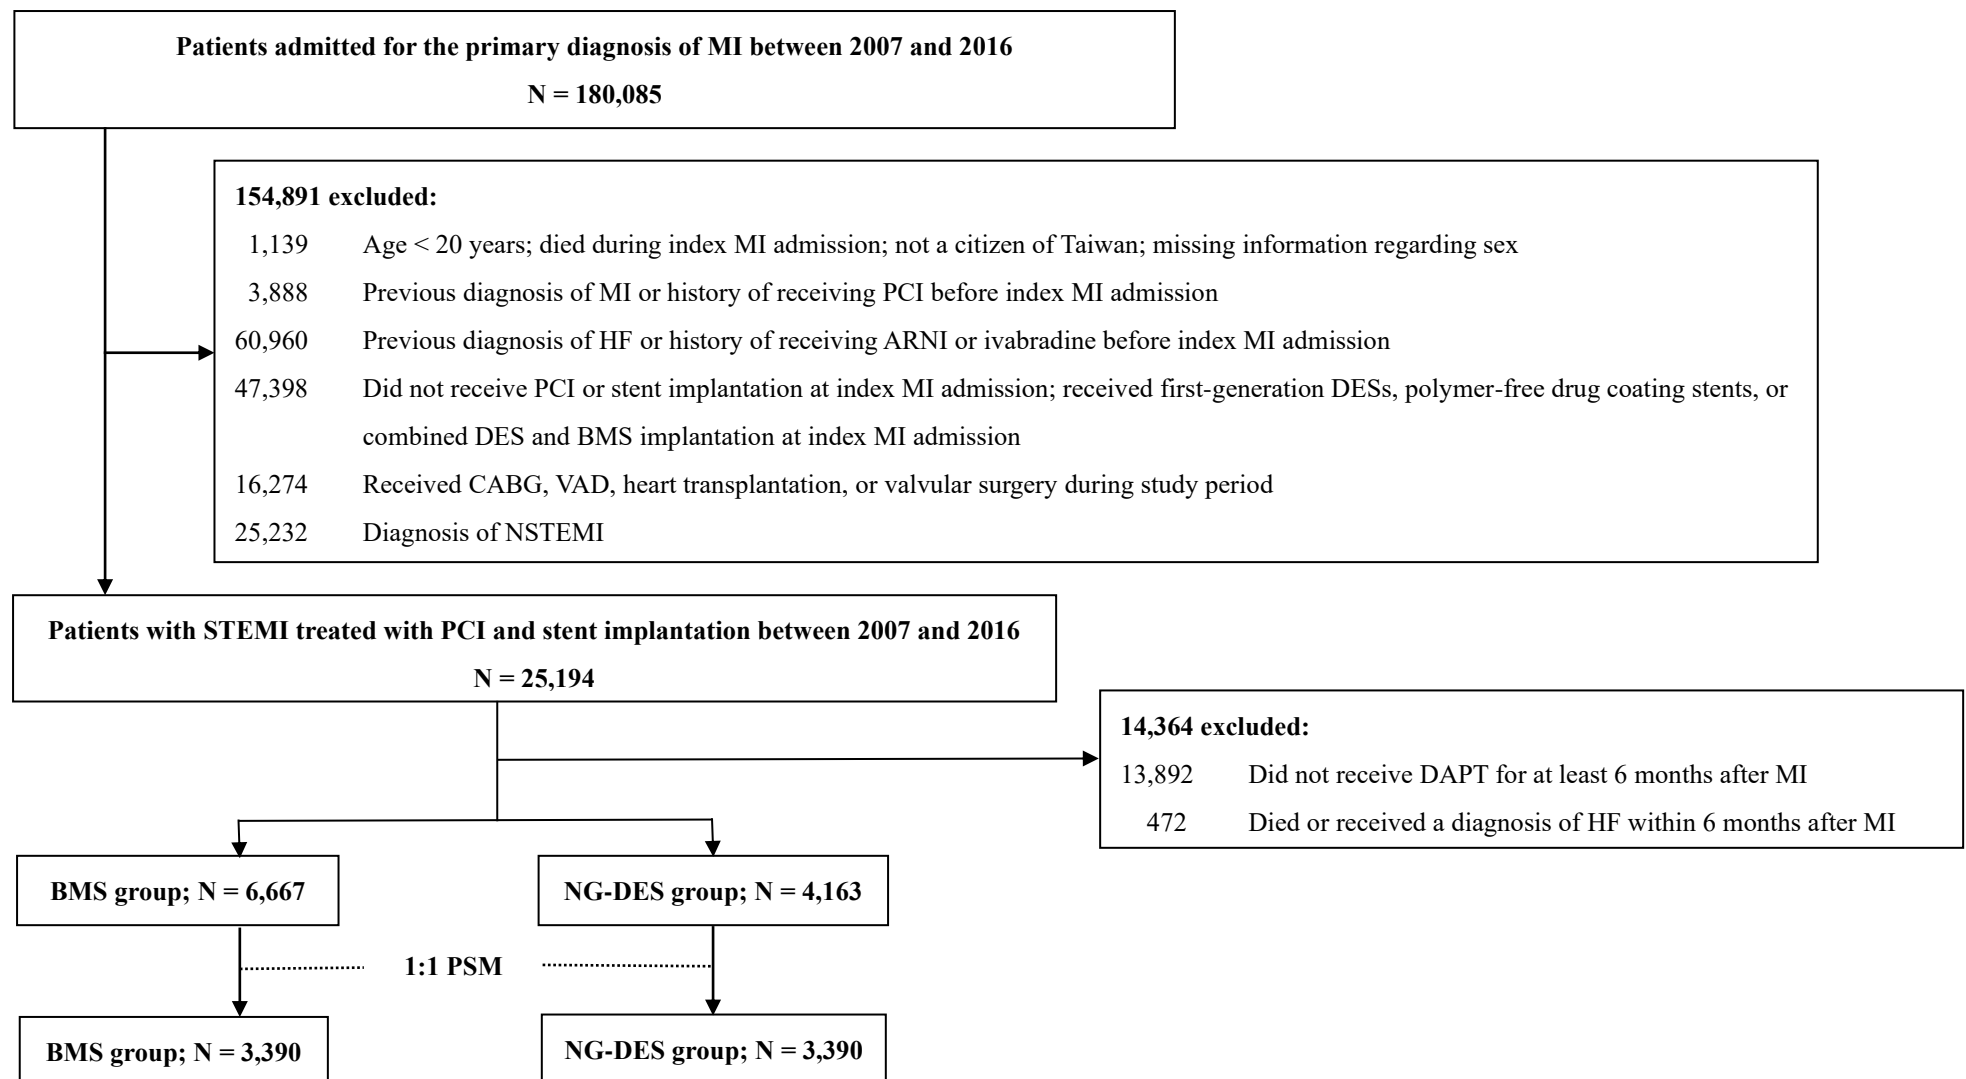

**Figure S1.** Selection process of patients with STEMI who received DAPT for an undefined duration of longer than 6 months following stent implantation. Abbreviations: ARNI = angiotensin receptor/neprilysin inhibitor; BMS = bare-metal stent; CABG = coronary artery bypass graft; DAPT = dual antiplatelet therapy; DES = drug-eluting stent; HF = heart failure; MI = myocardial infarction; NG-DES = new-generation drug-eluting stent; NSTEMI = non-ST-elevation myocardial infarction; PCI = percutaneous coronary intervention; PSM = propensity score matching; STEMI = ST-elevation myocardial infarction; VAD = ventricular assist device.

**Table S3. Baseline characteristics of patients with STEMI who received DAPT for an undefined duration of longer than 6 months following stent implantation.**

|                                              | Before PSM  |         |             |         |        | After PSM   |         |             |         |        |
|----------------------------------------------|-------------|---------|-------------|---------|--------|-------------|---------|-------------|---------|--------|
|                                              | NG-DES      |         | BMS         |         | SMD*   | NG-DES      |         | BMS         |         | SMD*   |
|                                              | n           | (%)     | n           | (%)     |        | n           | (%)     | n           | (%)     |        |
| N (%)                                        | 4,163       |         | 6,667       |         |        | 3,390       |         | 3,390       |         |        |
| Age, mean (SD)                               | 58.1 (11.8) |         | 58.6 (12.6) |         |        | 58.1 (11.5) |         | 58.1 (11.5) |         |        |
| Age group, n (%)                             |             |         |             |         |        |             |         |             |         |        |
| 20–44                                        | 518         | (12.4)  | 845         | (12.7)  | 0.007  | 404         | (11.9)  | 407         | (12.0)  | 0.003  |
| 45–64                                        | 2,491       | (59.8)  | 3,807       | (57.1)  | 0.056  | 2,051       | (60.5)  | 2,037       | (60.1)  | 0.008  |
| 65–74                                        | 739         | (17.8)  | 1,149       | (17.2)  | 0.014  | 618         | (18.2)  | 634         | (18.7)  | 0.012  |
| ≥75                                          | 415         | (10.0)  | 866         | (13.0)  | 0.095  | 317         | (9.4)   | 312         | (9.2)   | 0.005  |
| Male (%)                                     | 3,651       | (87.7)  | 5,766       | (86.5)  | 0.036  | 3,039       | (89.6)  | 3,039       | (89.6)  | <0.001 |
| Clinical data of index PCI                   |             |         |             |         |        |             |         |             |         |        |
| Diagnostic year                              |             |         |             |         |        |             |         |             |         |        |
| 2007–2010                                    | 446         | (10.7)  | 2,291       | (34.4)  | 0.590  | 428         | (12.6)  | 428         | (12.6)  | <0.001 |
| 2011–2013                                    | 1,345       | (32.3)  | 2,294       | (34.4)  | 0.045  | 1,236       | (36.5)  | 1,236       | (36.5)  | <0.001 |
| 2014–2016                                    | 2,372       | (57.0)  | 2,082       | (31.2)  | 0.537  | 1,726       | (50.9)  | 1,726       | (50.9)  | <0.001 |
| Multivessel PCI                              | 454         | (10.9)  | 579         | (8.7)   | 0.075  | 318         | (9.4)   | 258         | (7.6)   | 0.064  |
| Number of stents, mean (SD)                  | 1.23 (0.54) |         | 1.29 (0.58) |         |        | 1.24 (0.54) |         | 1.25 (0.54) |         |        |
| IABP use, yes, n (%)                         | 190         | (4.6)   | 561         | (8.4)   | 0.157  | 169         | (5.0)   | 163         | (4.8)   | 0.008  |
| Comorbidity                                  |             |         |             |         |        |             |         |             |         |        |
| DM                                           | 1,153       | (27.7)  | 1,988       | (29.8)  | 0.047  | 947         | (27.9)  | 974         | (28.7)  | 0.018  |
| HTN                                          | 2,197       | (52.8)  | 3,444       | (51.7)  | 0.034  | 1,758       | (51.9)  | 1,737       | (51.2)  | 0.012  |
| Dyslipidemia                                 | 2,241       | (53.8)  | 3,268       | (49.0)  | 0.096  | 1,810       | (53.4)  | 1,776       | (52.4)  | 0.020  |
| CVD                                          | 164         | (3.9)   | 373         | (5.6)   | 0.078  | 139         | (4.1)   | 140         | (4.1)   | 0.001  |
| AF                                           | 116         | (2.8)   | 200         | (3.0)   | 0.013  | 92          | (2.7)   | 91          | (2.7)   | 0.002  |
| COPD/Asthma                                  | 156         | (3.7)   | 297         | (4.5)   | 0.036  | 132         | (3.9)   | 128         | (3.8)   | 0.006  |
| Dementia/Parkinsonism                        | 37          | (0.9)   | 86          | (1.3)   | 0.039  | 30          | (0.9)   | 34          | (1.0)   | 0.012  |
| OA/RA/Rheumatism                             | 370         | (8.9)   | 674         | (10.1)  | 0.042  | 309         | (9.1)   | 316         | (9.3)   | 0.007  |
| CHA <sub>2</sub> DS <sub>2</sub> -VASc score |             |         |             |         |        |             |         |             |         |        |
| ≥2                                           | 3,037       | (73.0)  | 4,952       | (74.3)  | 0.030  | 2,436       | (71.9)  | 2,468       | (72.8)  | 0.021  |
| 0–1                                          | 1,126       | (27.0)  | 1,715       | (25.7)  | 0.030  | 954         | (28.1)  | 922         | (27.2)  | 0.021  |
| Medication use                               |             |         |             |         |        |             |         |             |         |        |
| ACEI/ARB                                     | 3,390       | (81.4)  | 5,402       | (81.0)  | 0.010  | 2,760       | (81.4)  | 2,755       | (81.3)  | 0.004  |
| Beta-blockers                                | 3,270       | (78.5)  | 4,827       | (72.4)  | 0.143  | 2,609       | (77.0)  | 2,605       | (76.8)  | 0.003  |
| Nitrates                                     | 3,826       | (91.9)  | 6,104       | (91.6)  | 0.013  | 3,112       | (91.8)  | 3,078       | (90.8)  | 0.036  |
| Aspirin                                      | 4,163       | (100.0) | 6,667       | (100.0) | <0.001 | 3,390       | (100.0) | 3,390       | (100.0) | <0.001 |
| P2Y <sub>12</sub> inhibitors                 | 4,163       | (100.0) | 6,667       | (100.0) | <0.001 | 3,390       | (100.0) | 3,390       | (100.0) | <0.001 |
| Statins                                      | 3,664       | (88.0)  | 5,289       | (79.3)  | 0.237  | 2,951       | (87.1)  | 2,969       | (87.6)  | 0.016  |
| PPIs                                         | 404         | (9.7)   | 706         | (10.6)  | 0.029  | 315         | (9.3)   | 331         | (9.8)   | 0.016  |
| Steroids                                     | 345         | (8.3)   | 736         | (11.0)  | 0.093  | 296         | (8.7)   | 300         | (8.8)   | 0.004  |
| NSAIDs                                       | 1,124       | (27.0)  | 2,314       | (34.7)  | 0.167  | 987         | (29.1)  | 911         | (26.9)  | 0.050  |
| ORBIT score                                  |             |         |             |         |        |             |         |             |         |        |
| ≥3                                           | 62          | (1.5)   | 178         | (2.7)   | 0.083  | 49          | (1.4)   | 50          | (1.5)   | 0.002  |
| 0–2                                          | 4,101       | (98.5)  | 6,489       | (97.3)  | 0.083  | 3,341       | (98.6)  | 3,340       | (98.5)  | 0.002  |
| ARC criteria of bleeding risk                |             |         |             |         |        |             |         |             |         |        |
| Major criteria                               |             |         |             |         |        |             |         |             |         |        |
| Malignancy                                   | 112         | (2.7)   | 129         | (1.9)   | 0.050  | 66          | (1.9)   | 70          | (2.1)   | 0.008  |
| Long-term use of anticoagulants              | 42          | (1.0)   | 100         | (1.5)   | 0.044  | 34          | (1.0)   | 35          | (1.0)   | 0.003  |
| End-stage CKD                                | 10          | (0.2)   | 11          | (0.2)   | 0.017  | 8           | (0.2)   | 4           | (0.1)   | 0.028  |
| ICH                                          | 18          | (0.4)   | 43          | (0.6)   | 0.029  | 17          | (0.5)   | 19          | (0.6)   | 0.008  |
| Minor criteria                               |             |         |             |         |        |             |         |             |         |        |
| Age ≥75                                      | 415         | (10.0)  | 866         | (13.0)  | 0.095  | 317         | (9.4)   | 312         | (9.2)   | 0.005  |
| Ischemic stroke                              | 82          | (2.0)   | 201         | (3.0)   | 0.067  | 67          | (2.0)   | 68          | (2.0)   | 0.002  |

|                                                          |       |         |       |         |        |       |         |       |         |        |
|----------------------------------------------------------|-------|---------|-------|---------|--------|-------|---------|-------|---------|--------|
| Bleeding events requiring hospitalization or transfusion | 33    | (0.8)   | 107   | (1.6)   | 0.075  | 28    | (0.8)   | 41    | (1.2)   | 0.038  |
| <b>DAPT at discharge of index MI</b>                     |       |         |       |         |        |       |         |       |         |        |
| Aspirin                                                  | 4,163 | (100.0) | 6,667 | (100.0) | <0.001 | 3,390 | (100.0) | 3,390 | (100.0) | <0.001 |
| P2Y <sub>12</sub> inhibitors                             | 4,163 | (100.0) | 6,667 | (100.0) | <0.001 | 3,390 | (100.0) | 3,390 | (100.0) | <0.001 |

Abbreviations: ACEI = angiotensin-converting enzyme inhibitor; ARB = angiotensin II receptor blocker; ARC = Academic Research Consortium; AF = atrial fibrillation; BMS = bare-metal stent; CHA<sub>2</sub>DS<sub>2</sub>-VASc score = congestive heart failure, hypertension, age  $\geq 75$  years, diabetes, stroke/transient ischemic attack, vascular disease, age 65 to 74 years, female sex; CKD = chronic kidney disease; COPD = chronic obstructive pulmonary disease; CVD = cerebrovascular disease; DES = drug-eluting stent; DM = diabetes mellitus; HTN = hypertension; IABP = intra-aortic balloon pump; ICH = intracranial hemorrhage; NG-DES = newer-generation drug-eluting stent; NSAIDs = nonsteroidal anti-inflammatory drugs; OA = osteoarthritis; OACs = oral anticoagulants; ORBIT score = age  $\geq 75$  years, bleeding history, chronic kidney disease, treatment with antiplatelet; PCI = percutaneous coronary intervention; PPIs = proton pump inhibitors; PSM = propensity score matching; RA = rheumatoid arthritis; SD = standard deviation; SMD = standardized mean difference; STEMI = ST-elevation myocardial infarction;

\*SMD = difference in means or proportions divided by standard error and imbalance defined as an absolute value greater than 0.1.

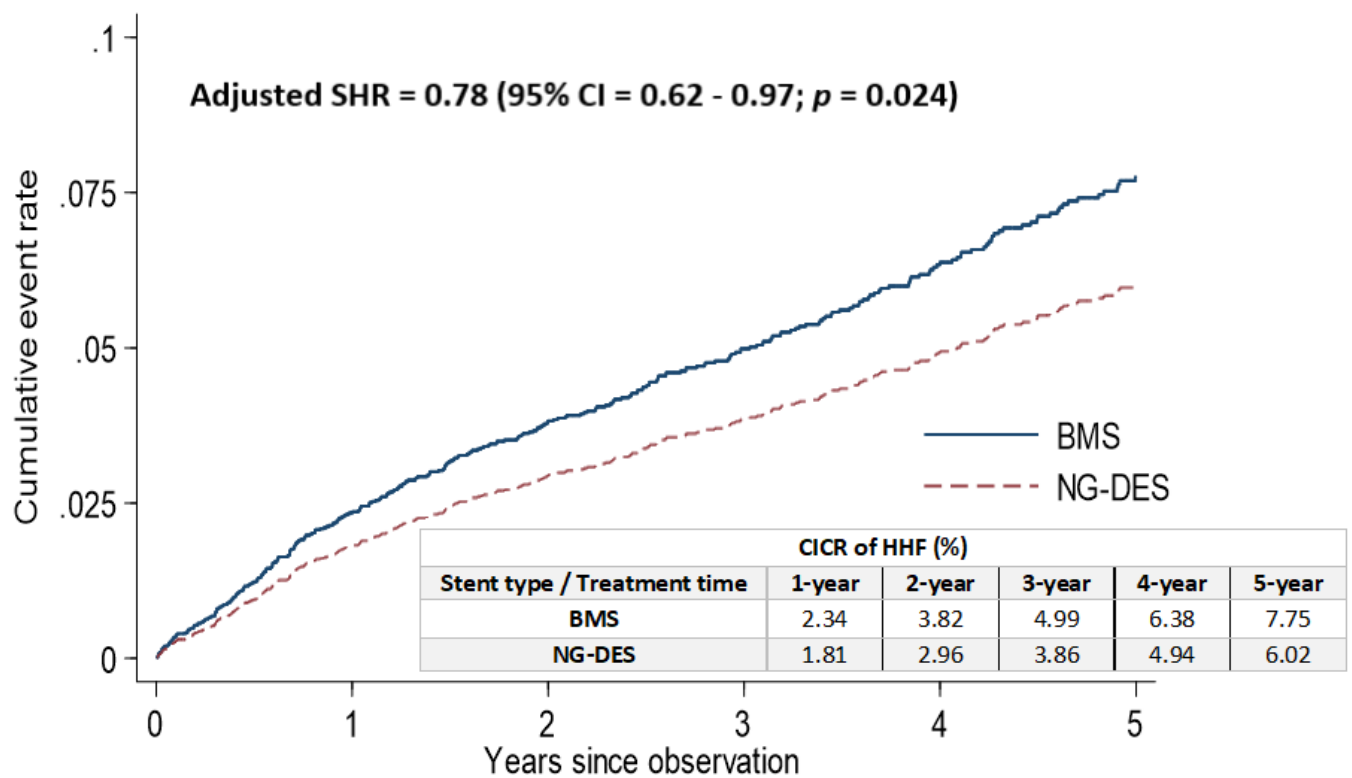

**Figure S2.** Cumulative incidence of HHF for competing risk among patients with STEMI who received DAPT for an undefined duration of longer than 6 months following stent implantation.

Abbreviations: BMS = bare-metal stent; CI = confidence interval; CICR = cumulative incidence for competing risk; DAPT = dual antiplatelet therapy; HHF = hospitalization for heart failure; NG-DES = new-generation drug-eluting stent; STEMI = ST-elevation myocardial infarction; SHR = subdistribution hazard ratio.

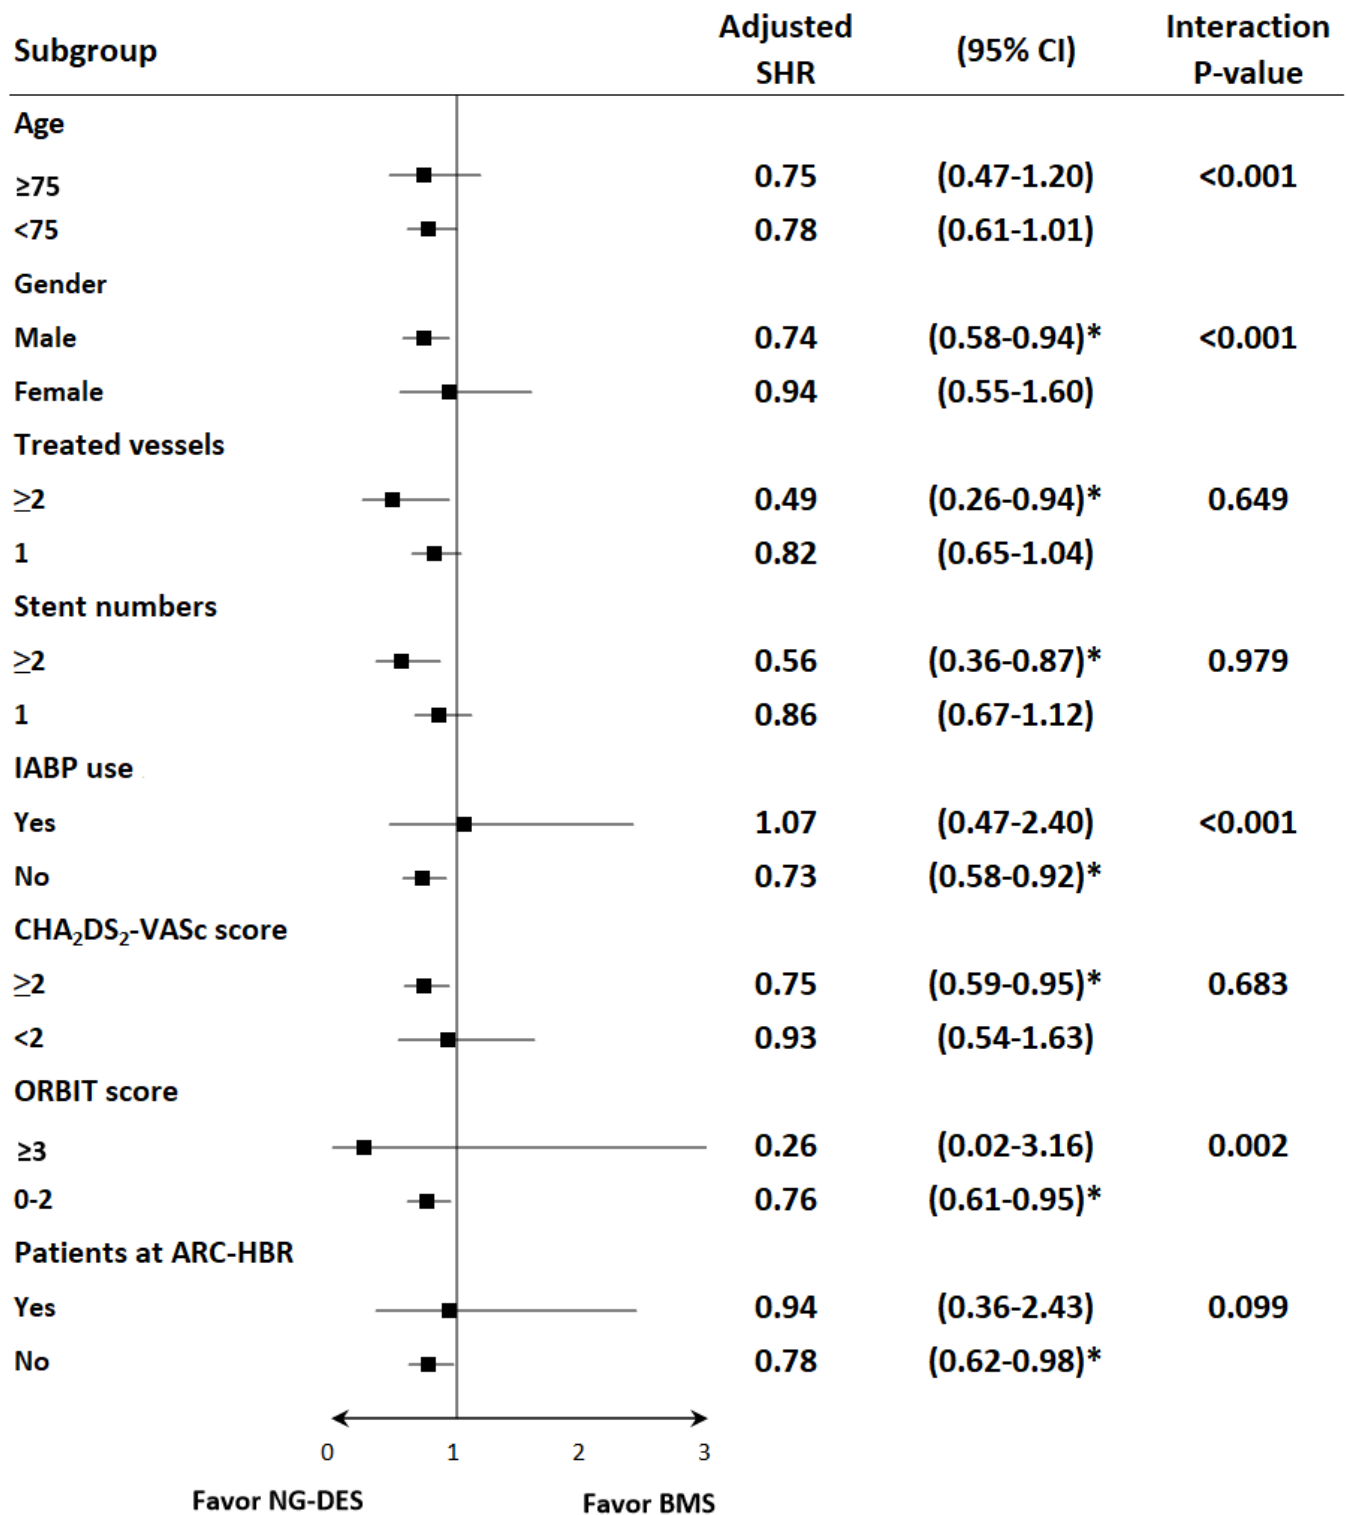

**Figure S3.** Subgroup analysis of the risk of HHF among patients with STEMI who received DAPT for an undefined duration of longer than 6 months following stent implantation. Abbreviations: BMS = bare-metal stent; CHA<sub>2</sub>DS<sub>2</sub>-VASc score = congestive heart failure, hypertension, age ≥ 75 years, diabetes, stroke/transient ischemic attack, vascular disease, age 65 to 74 years, female sex; CI = confidence interval; HHF = hospitalization for heart failure; IABP = intra-aortic balloon pump; NG-DES = new-generation drug-eluting stent; STEMI = ST-elevation myocardial infarction; ORBIT score = age ≥ 75 years, bleeding history, chronic kidney disease, treatment with antiplatelet; PCI = percutaneous coronary intervention; SHR = subdistribution hazard ratio.

\*  $p < 0.05$

**Table S4. The rates of CICR and the risk of repeat PCI in patients with STEMI receiving NG-DESs compared with those patients with STEMI receiving BMSs.**

| Stent types   | 5-year CICR | Adjusted SHR (95% CI) | <i>p</i> |
|---------------|-------------|-----------------------|----------|
| <b>BMS</b>    | 39.7%       | Reference             | -        |
| <b>NG-DES</b> | 34.9%       | 0.85 (0.80 – 0.90)    | <0.001   |

Abbreviation: BMS = bare-metal stent; CI = confidence interval; CICR = cumulative incidence competing risk; NG-DES = new-generation drug-eluting stent; PCI = percutaneous coronary intervention; SHR = subdistribution hazard ratio; STEMI = ST-elevation myocardial infarction

**Table S5. The rates of CICR and the risk of recurrent MI in patients with STEMI receiving NG-DESs compared with those patients with STEMI receiving BMSs.**

| Stent types   | 5-year CICR | Adjusted SHR (95% CI) | <i>p</i> |
|---------------|-------------|-----------------------|----------|
| <b>BMS</b>    | 12.2%       | Reference             | -        |
| <b>NG-DES</b> | 10.0%       | 0.80 (0.72 – 0.90)    | <0.001   |

Abbreviation: BMS = bare-metal stent; CI = confidence interval; CICR = cumulative incidence competing risk; MI = myocardial infarction; NG-DES = newer-generation drug-eluting stent; SHR = subdistribution hazard ratio; STEMI = ST-elevation myocardial infarction.



**Table S6. Baseline characteristics of patients with STEMI who were at ARC-HBR and non-ARC-HBR after PSM.**

|                                                                   | <b>ARC-HBR*</b><br><b>N= 781</b> | <b>Non-ARC-HBR</b><br><b>N = 12,881</b> | <b><i>p</i></b> |
|-------------------------------------------------------------------|----------------------------------|-----------------------------------------|-----------------|
| <b>Age, mean±SD</b>                                               | 68.6 ± 12.6                      | 58.7 ± 12.1                             | <0.001          |
| <b>Male, n (%)</b>                                                | 622 (79.6)                       | 11,356 (88.2)                           | <0.001          |
| <b>Use of NG-DES, n (%)</b>                                       | 387 (49.6)                       | 6,444 (50.0)                            | 0.79            |
| <b>Major ARC criteria of bleeding risk</b>                        |                                  |                                         |                 |
| - <b>Malignancy</b>                                               | 353 (45.2)                       | 0                                       | -               |
| - <b>Long-term use of anticoagulants</b>                          | 195 (25.0)                       | 0                                       | -               |
| - <b>End-stage CKD</b>                                            | 34 (4.4)                         | 0                                       | -               |
| - <b>ICH</b>                                                      | 72 (9.2)                         | 0                                       | -               |
| <b>Minor ARC criteria of bleeding risk</b>                        |                                  |                                         |                 |
| - <b>Age ≥75</b>                                                  | 303 (38.8)                       | 1,473 (11.4)                            | <0.001          |
| - <b>Ischemic stroke</b>                                          | 154 (19.7)                       | 245 (1.9)                               | <0.001          |
| - <b>Bleeding events requiring hospitalization or transfusion</b> | 69 (8.8)                         | 122 (0.9)                               | <0.001          |
| <b>DAPT adherence, n (%)</b>                                      |                                  |                                         |                 |
| - <b>At discharge</b>                                             | 768 (98.3)                       | 12,759 (99.1)                           | 0.071           |
| - <b>1 month after discharge</b>                                  | 564 (72.2)                       | 11,487 (89.2)                           | <0.001          |
| - <b>3 months after discharge</b>                                 | 463 (59.3)                       | 9,155 (71.1)                            | <0.001          |
| - <b>6 months after discharge</b>                                 | 347 (44.4)                       | 6,760 (52.5)                            | <0.001          |
| - <b>12 months after discharge</b>                                | 159 (20.4)                       | 2,973 (23.1)                            | 0.075           |

Abbreviations: ARC = Academic Research Consortium; CKD = chronic kidney disease; DAPT = dual antiplatelet therapy; DES = drug-eluting stent; HBR = high bleeding risk; ICH = intracranial hemorrhage; NG-DES = new-generation drug-eluting stent; PSM = propensity score matching; SD = standard deviation; STEMI = ST-elevation myocardial infarction.

\*Patients were defined to be at ARC-HBR if at least 1 clinical major or 2 minor ARC criteria of bleeding risk are met.
